# Supplementary material
Source: PubMed Central journal article supplement (PMC5247489)
Supplement: rspb20161857supp1.pdf [file rspb20161857supp1.pdf]

## Supplementary Material

We were interested in whether different Defence Types produced different relationships between Defense score and EQ. Unfortunately, the fact that all species with Defence Type = 0 had a Defence score = 0, we could not run a phylogenetic ANCOVA with the interaction term between Defence Type and Defence score. We therefore approached the analysis in two ways. First we ran the model without the interaction term to test for the overall effect of Defence score on EQ. The full results are below:

```
Generalized least squares fit by REML
Model: log10(EQ) ~ DefType + Defense + PrimInsect + Open
Data: EQdata6
      AIC      BIC    logLik
-642.8718 -602.7186 330.4359
```

```
Correlation Structure: corPagel
Formula: ~1
Parameter estimate(s):
  lambda
0.8515244
```

```
Coefficients:
              Value  Std.Error  t-value p-value
(Intercept) -0.04913420 0.11256308 -0.4365037 0.6626
DefType1     0.14415381 0.06111960  2.3585527 0.0186
DefType2     0.11969665 0.06348903  1.8853123 0.0598
DefType3    -0.04919038 0.13034659 -0.3773814 0.7060
Defense      -0.00427511 0.00145461 -2.9390108 0.0034
PrimInsect1  0.03044011 0.02131898  1.4278407 0.1538
Open        -0.02226866 0.02973175 -0.7489856 0.4541
```

```
Correlation:
      (Intr)  DfTy1  DfTy2  DfTy3  Defens  PrmIn1
DefType1    -0.048
DefType2     0.023  0.289
DefType3     0.004  0.278  0.315
Defense     -0.042 -0.509 -0.558 -0.523
PrimInsect1 -0.066  0.011 -0.005 -0.005 -0.087
Open        -0.105  0.035 -0.005 -0.023 -0.015 -0.038
```

```
Standardized residuals:
      Min      Q1      Med      Q3      Max
-2.3493172 -0.2827564  0.1735680  0.6323864  3.2979809
```

```
Residual standard error: 0.2522192
Degrees of freedom: 647 total; 640 residual
```

In order to test whether the relationship between Defence and EQ differed among the three different Defence Types (i.e., do the three slopes differ significantly from each other), we needed to run the model with interaction term but generated random variation in Defence score for species with Defence Type = 0. We generated random Defence scores (DefenseX) between -2 and 2 (so they remained centered on 0) for species with Defence Type 0, and then ran the full phylogenetic ANOVA, with interaction effect:

Generalized least squares fit by REML

Model: log10(EQ) ~ DefType \* DefenseX + PrimInsect + Open

Data: EQdata6

| AIC       | BIC       | logLik   |
|-----------|-----------|----------|
| -615.1043 | -561.6231 | 319.5522 |

Correlation Structure: corPagel

Formula: ~1

Parameter estimate(s):

lambda

0.8528339

Coefficients:

|                   | Value      | Std.Error | t-value    | p-value |
|-------------------|------------|-----------|------------|---------|
| (Intercept)       | -0.0412598 | 0.1131263 | -0.3647232 | 0.7154  |
| DefType1          | 0.1836026  | 0.0699553 | 2.6245722  | 0.0089  |
| DefType2          | 0.0780844  | 0.0716211 | 1.0902423  | 0.2760  |
| DefType3          | 1.1132887  | 1.2049480 | 0.9239309  | 0.3559  |
| DefenseX          | 0.0017139  | 0.0045822 | 0.3740313  | 0.7085  |
| PrimInsect1       | 0.0274358  | 0.0214978 | 1.2762184  | 0.2023  |
| Open              | -0.0221952 | 0.0297607 | -0.7457861 | 0.4561  |
| DefType1:DefenseX | -0.0077865 | 0.0050589 | -1.5391594 | 0.1243  |
| DefType2:DefenseX | -0.0042886 | 0.0050048 | -0.8568855 | 0.3918  |
| DefType3:DefenseX | -0.0304964 | 0.0257104 | -1.1861522 | 0.2360  |

Correlation:

|                   | (Intr) | DfTy1  | DfTy2  | DfTy3  | DefnsX | PrmIn1 | Open   | DT1:D | DT2:D |
|-------------------|--------|--------|--------|--------|--------|--------|--------|-------|-------|
| DefType1          | -0.013 |        |        |        |        |        |        |       |       |
| DefType2          | -0.007 | 0.003  |        |        |        |        |        |       |       |
| DefType3          | 0.003  | 0.002  | -0.002 |        |        |        |        |       |       |
| DefenseX          | -0.010 | 0.008  | -0.001 | -0.002 |        |        |        |       |       |
| PrimInsect1       | -0.068 | -0.006 | 0.017  | -0.110 | 0.037  |        |        |       |       |
| Open              | -0.106 | 0.020  | 0.005  | 0.013  | 0.027  | -0.037 |        |       |       |
| DefType1:DefenseX | -0.022 | -0.285 | 0.001  | 0.003  | -0.906 | -0.048 | -0.021 |       |       |
| DefType2:DefenseX | 0.013  | -0.007 | -0.267 | 0.006  | -0.918 | -0.072 | -0.034 | 0.832 |       |
| DefType3:DefenseX | -0.003 | -0.002 | 0.004  | -0.980 | -0.176 | 0.097  | -0.021 | 0.158 | 0.158 |

Standardized residuals:

| Min        | Q1         | Med       | Q3        | Max       |
|------------|------------|-----------|-----------|-----------|
| -2.4761207 | -0.3097824 | 0.1403727 | 0.5892626 | 3.2593139 |

Residual standard error: 0.2528642

Degrees of freedom: 647 total; 637 residual

We then calculated the coefficients (i.e., slopes) of each Defence Type line and the error variance of each using this information:

|                |                    |                                     |
|----------------|--------------------|-------------------------------------|
| Defence Type 1 | slope = -0.0060726 | variance = $2.32107 \times 10^{-6}$ |
| Defence Type 2 | slope = -0.0025747 | variance = $1.66997 \times 10^{-6}$ |
| Defence Type 3 | slope = -0.0287825 | variance = $6.38317 \times 10^{-4}$ |

We calculated a pooled weighted variance across the three Defence Types and then used a Tukey's test to determine if the two most different slopes (types 2 and 3) different at a statistically significant level:  $q=2.8466$ ,  $p=0.1166$ . Therefore the two most different slopes did not differ significantly at the  $\alpha=0.05$  level, and we stopped the analysis there.

The full model results for the phylogenetic ANOVA using Log Brain Mass and Log Body Mass are below:

Generalized least squares fit by REML

Model: LogBrainMass ~ LogMass + DefType + Defense + PrimInsect + Open

Data: EQdata6

|  | AIC       | BIC      | logLik  |
|--|-----------|----------|---------|
|  | -793.9941 | -749.395 | 406.997 |

Correlation Structure: corPagel

Formula: ~1

Parameter estimate(s):

| lambda    |
|-----------|
| 0.9265906 |

Coefficients:

|             | Value      | Std.Error  | t-value  | p-value |
|-------------|------------|------------|----------|---------|
| (Intercept) | -0.8975085 | 0.12311993 | -7.28971 | 0.0000  |
| LogMass     | 0.6069434  | 0.00999317 | 60.73585 | 0.0000  |
| DefType1    | 0.1340435  | 0.05835688 | 2.29696  | 0.0219  |
| DefType2    | 0.0612484  | 0.05899772 | 1.03815  | 0.2996  |
| DefType3    | -0.0388774 | 0.13065551 | -0.29756 | 0.7661  |
| Defense     | -0.0032129 | 0.00131518 | -2.44298 | 0.0148  |
| PrimInsect1 | -0.0101406 | 0.01948778 | -0.52036 | 0.6030  |
| Open        | -0.0284967 | 0.02586975 | -1.10155 | 0.2711  |

Correlation:

|             | (Intr) | LgMss  | DfTy1  | DfTy2  | DfTy3  | Defens | PrmIn1 |
|-------------|--------|--------|--------|--------|--------|--------|--------|
| LogMass     | -0.244 |        |        |        |        |        |        |
| DefType1    | -0.059 | 0.051  |        |        |        |        |        |
| DefType2    | -0.001 | 0.081  | 0.250  |        |        |        |        |
| DefType3    | -0.002 | 0.003  | 0.227  | 0.270  |        |        |        |
| Defense     | -0.017 | -0.082 | -0.462 | -0.532 | -0.469 |        |        |
| PrimInsect1 | -0.091 | 0.150  | 0.013  | 0.001  | -0.009 | -0.092 |        |
| Open        | -0.092 | 0.039  | 0.032  | -0.002 | -0.023 | -0.011 | -0.035 |

Standardized residuals:

|  | Min        | Q1         | Med        | Q3        | Max       |
|--|------------|------------|------------|-----------|-----------|
|  | -2.7378901 | -0.6400488 | -0.1776734 | 0.5723134 | 4.2159133 |

Residual standard error: 0.2589479

Degrees of freedom: 647 total; 639 residual
